# Supplementary material
Source: PubMed Central journal article supplement (PMC2288539)
Supplement: neo1004_0329SD1.pdf [file neo1004_0329SD1.pdf]

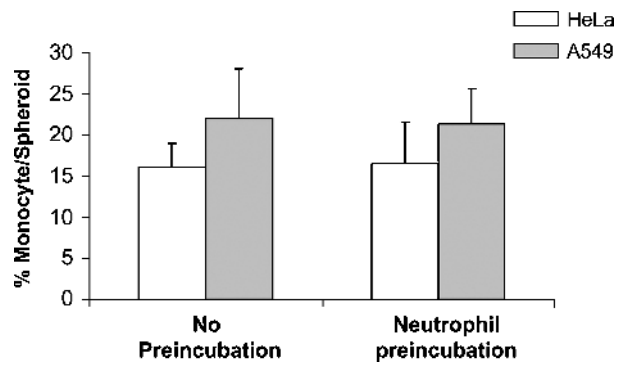

**Figure W1.** Neutrophils do not inhibit monocyte infiltration into human tumor spheroids *in vitro*. Human tumor (cervical; HeLa or lung; A549) spheroids were cocultured with either monocytes alone for 24 hours or neutrophils for 5 hours followed by monocytes for 24 hours. Flow cytometry of enzymatically dispersed spheroids showed that there were no significant differences ( $P = .252$ ) in the level of monocyte infiltration into spheroids when neutrophils were already present in these structures compared to when they were absent.
